# Supplementary material for: Genome editing to model and reverse a prevalent mutation associated with myeloproliferative neoplasms
Source: PubMed Central journal article supplement (PMC7932127; doi:10.1371/journal.pone.0247858), 2021-03-04

### Acquisition Information

| # | Image ID   | Acquire Time            | Channels | Resolution | Intensities | Image Name                        | Comment                  |
|---|------------|-------------------------|----------|------------|-------------|-----------------------------------|--------------------------|
| 1 | 0003282_01 | Aug 10, 2018 2:19:53 PM | 700 800  | 169um      | Auto Auto   | Blot 1: PSTAT5, GAPDH and Bglobin | HUDEPs (100% and 0% Epo) |

### Image Display Values

| Channel | Color                       | Minimum | Maximum | K |
|---------|-----------------------------|---------|---------|---|
| 800     | Gray Scale (Black on White) | 0.0482  | 3.59    | 0 |

Figure 2c PSTAT5 and GAPDH and Bglobin

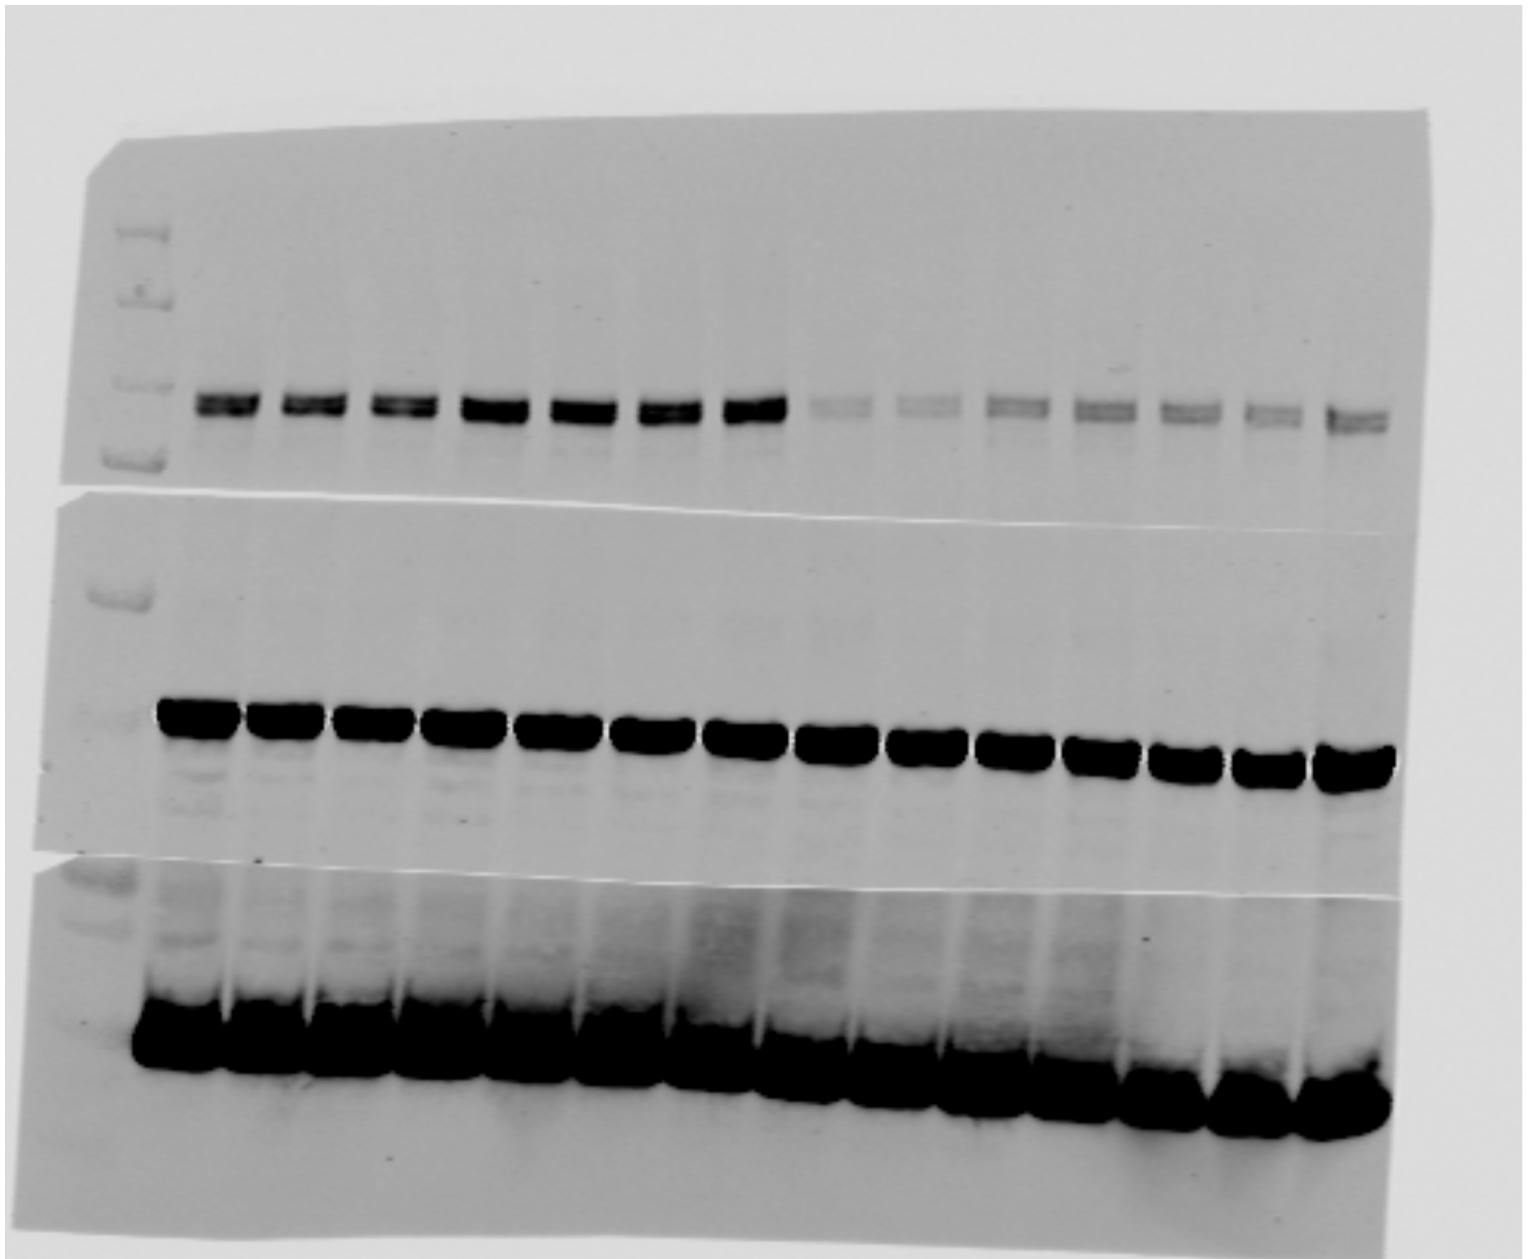

Acquisition Information

| # | Image ID   | Acquire Time            | Channels | Resolution | Intensities | Image Name                        | Comment                  |
|---|------------|-------------------------|----------|------------|-------------|-----------------------------------|--------------------------|
| 1 | 0003284_01 | Aug 10, 2018 2:34:48 PM | 700 800  | 169um      | Auto Auto   | Blot 3: STAT5, GAPDH, and Bglobin | HUDEPs (100% and 0% Epo) |

Image Display Values

| Channel | Color                       | Minimum | Maximum | K |
|---------|-----------------------------|---------|---------|---|
| 800     | Gray Scale (Black on White) | 0.688   | 7.42    | 0 |

Figure 2c STAT5 and GAPDH and Bglobin

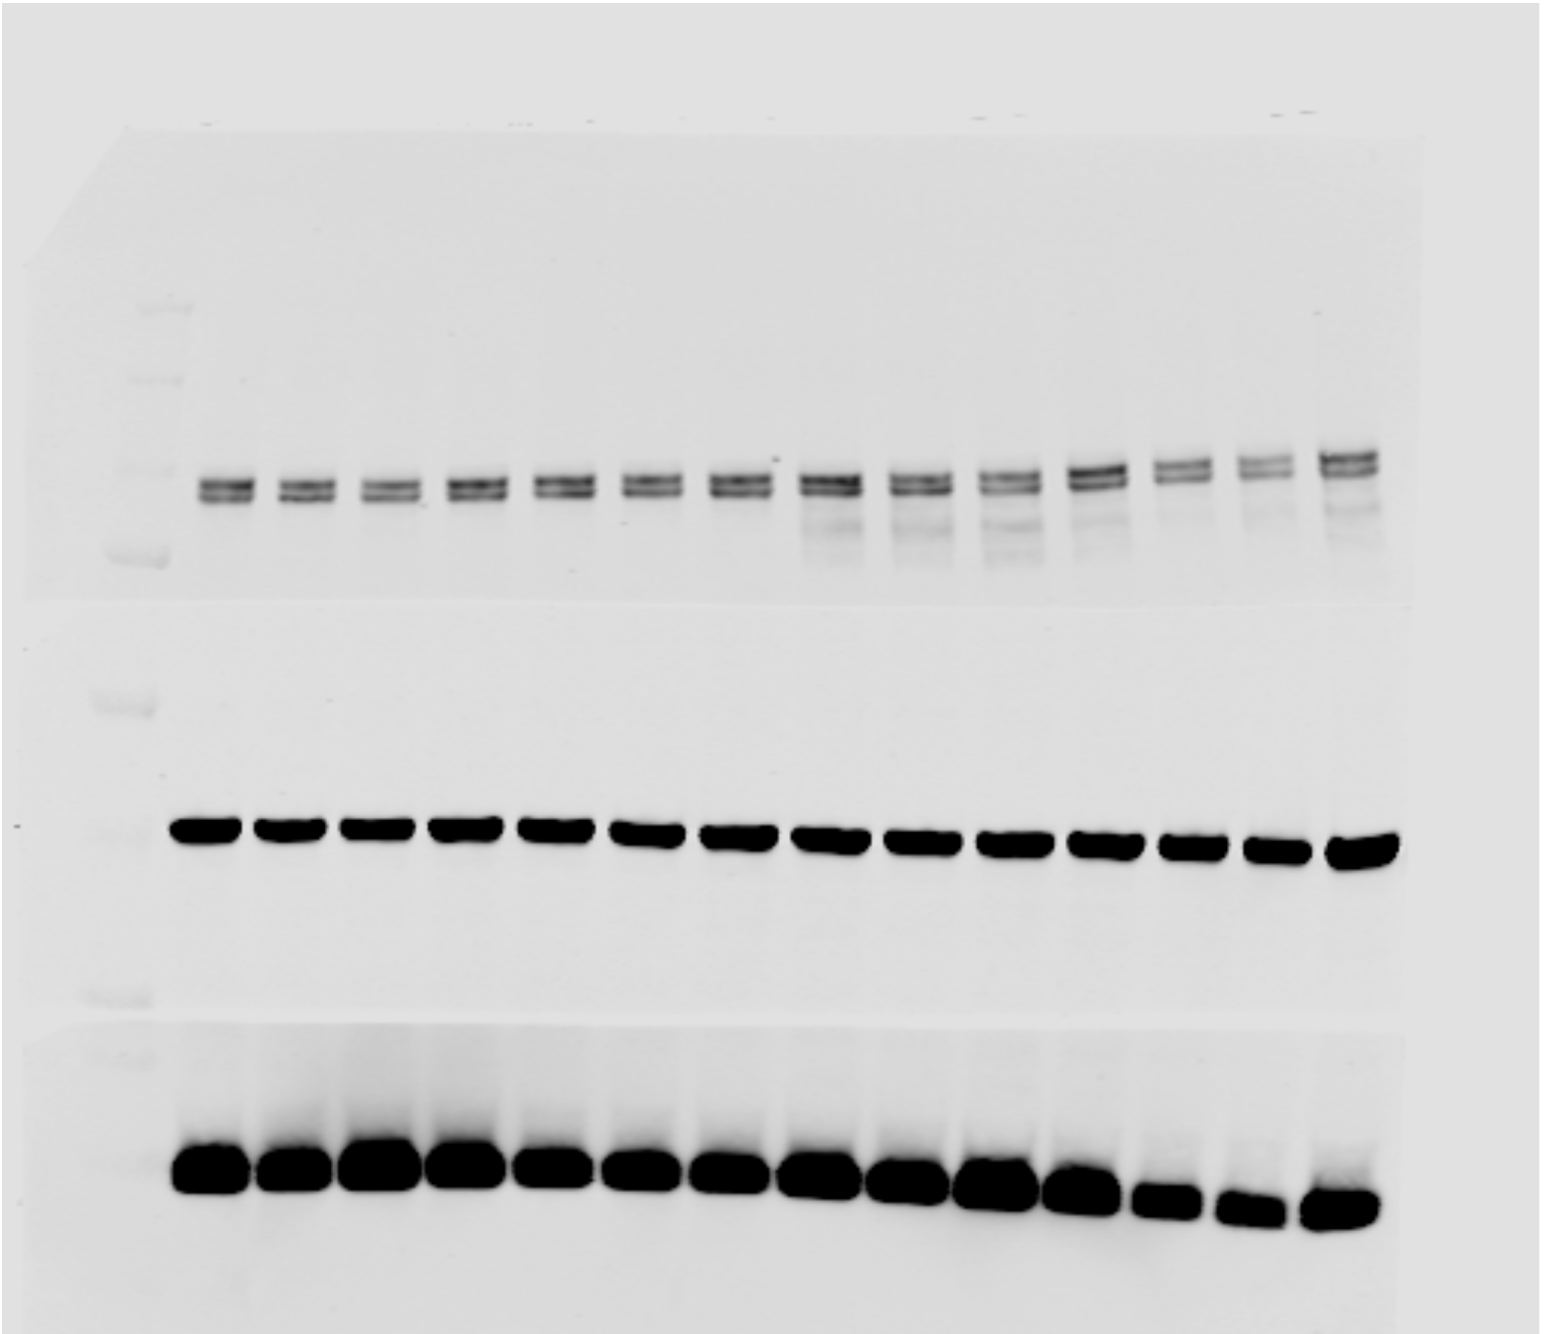

### Acquisition Information

| # | Image ID   | Acquire Time            | Channels | Resolution | Intensities | Image Name                       | Comment   |
|---|------------|-------------------------|----------|------------|-------------|----------------------------------|-----------|
| 1 | 0003689_01 | Sep 28, 2019 1:59:35 PM | 700 800  | 169um      | Auto Auto   | Blot1: PSTAT5 and GAPDH (no epo) | good blot |

### Image Display Values

| Channel | Color                       | Minimum | Maximum | K |
|---------|-----------------------------|---------|---------|---|
| 800     | Gray Scale (Black on White) | 0.222   | 2.98    | 0 |

Figure 2d PSTAT5 and GAPDH and Bglobin

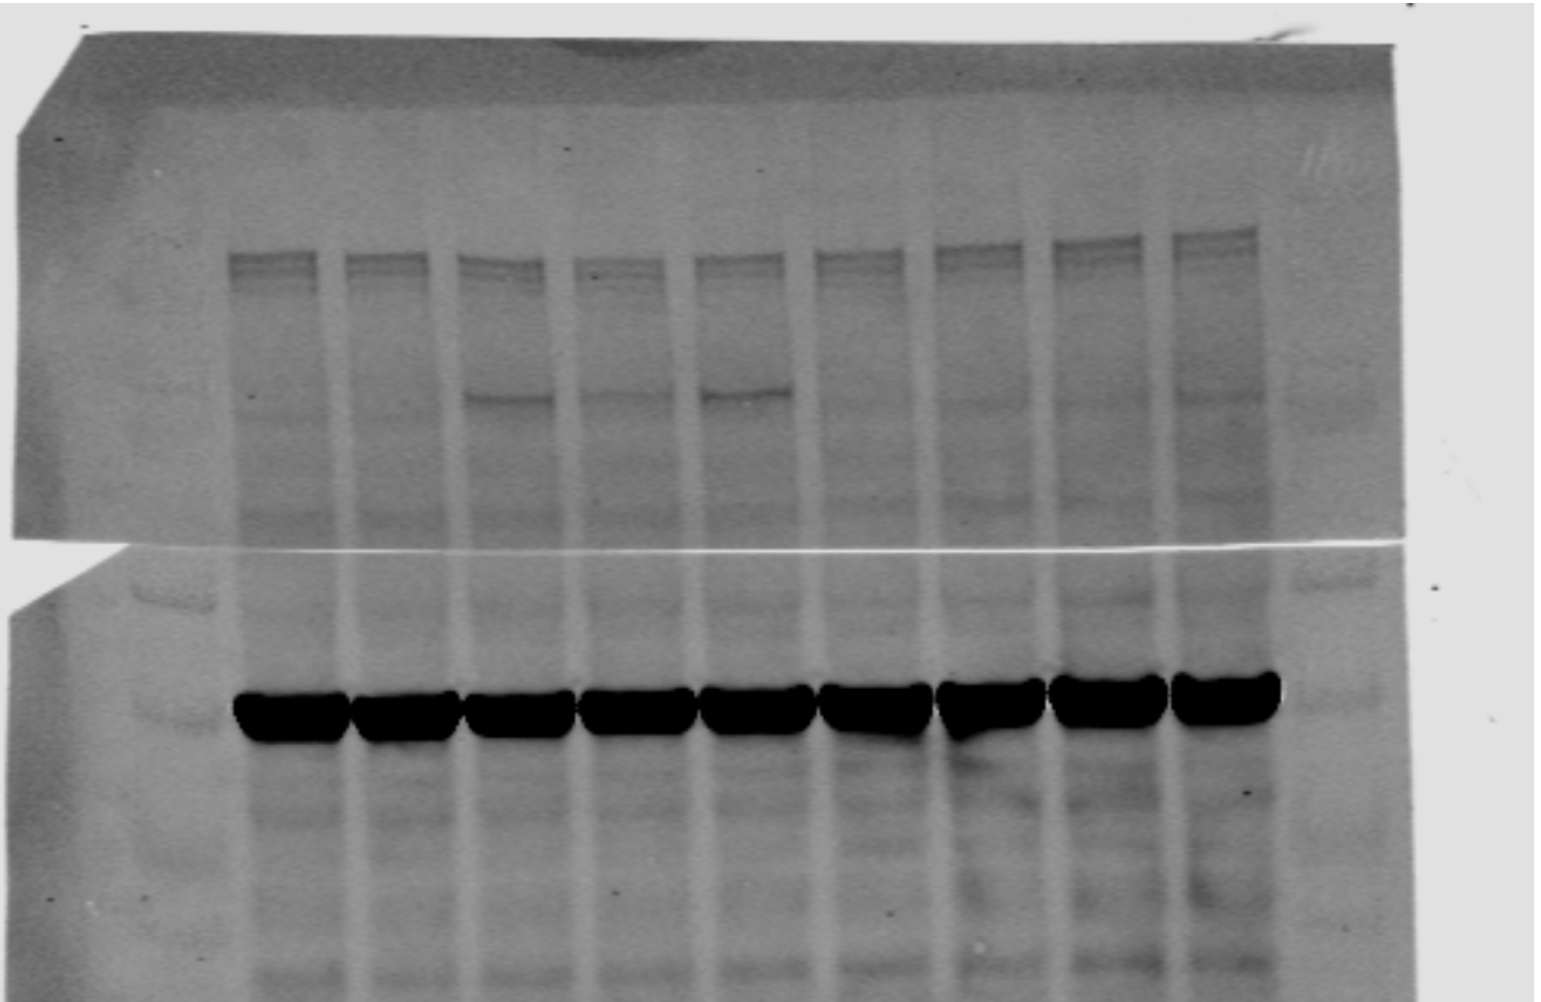

### Acquisition Information

| # | Image ID   | Acquire Time            | Channels | Resolution | Intensities | Image Name                       | Comment | Image Modifications |
|---|------------|-------------------------|----------|------------|-------------|----------------------------------|---------|---------------------|
| 1 | 0003690_01 | Sep 28, 2019 2:05:10 PM | 700 800  | 169um      | Auto Auto   | Blot 2: STAT5 anf GAPDH (no epo) | Flip    |                     |

### Image Display Values

| Channel | Color                       | Minimum | Maximum | K |
|---------|-----------------------------|---------|---------|---|
| 800     | Gray Scale (Black on White) | 0.0183  | 1.87    | 0 |

Figure 2d STAT5 and GAPDH

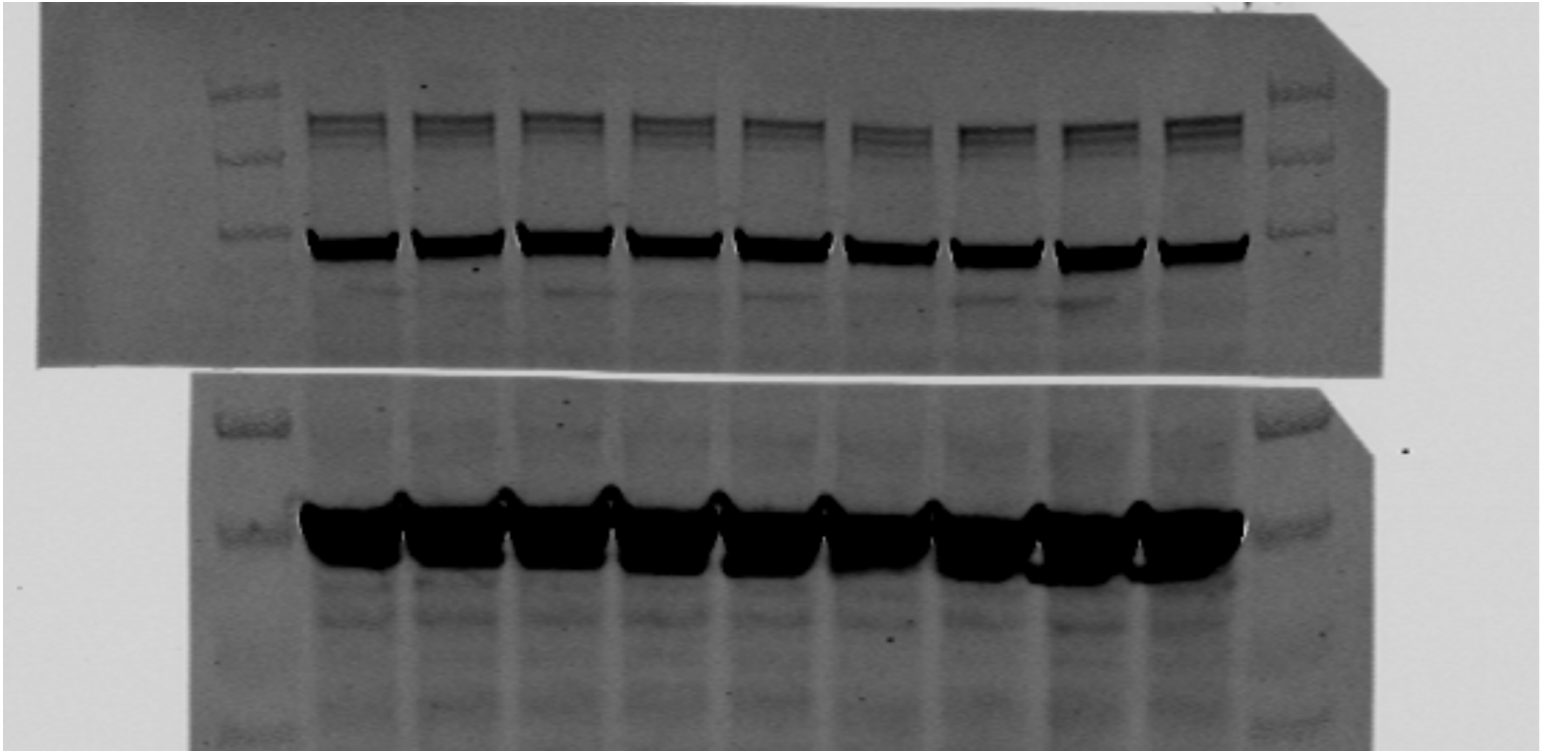



### Acquisition Information

| # | Image ID   | Acquire Time            | Channels | Resolution | Intensities | Image Name                                |
|---|------------|-------------------------|----------|------------|-------------|-------------------------------------------|
| 1 | 0002310_01 | Mar 18, 2018 6:26:17 PM | 700 800  | 169um      | Auto Auto   | Blot 4: PSTAT5, GAPDH and Bglobin flipped |

### Image Display Values

| Channel | Color                       | Minimum | Maximum | K |
|---------|-----------------------------|---------|---------|---|
| 800     | Gray Scale (Black on White) | 0.0391  | 2.23    | 0 |

Figure 4c PSTAT5 and GAPDH and Bglobin. \*This blot has been cut and reversed as shown below\*

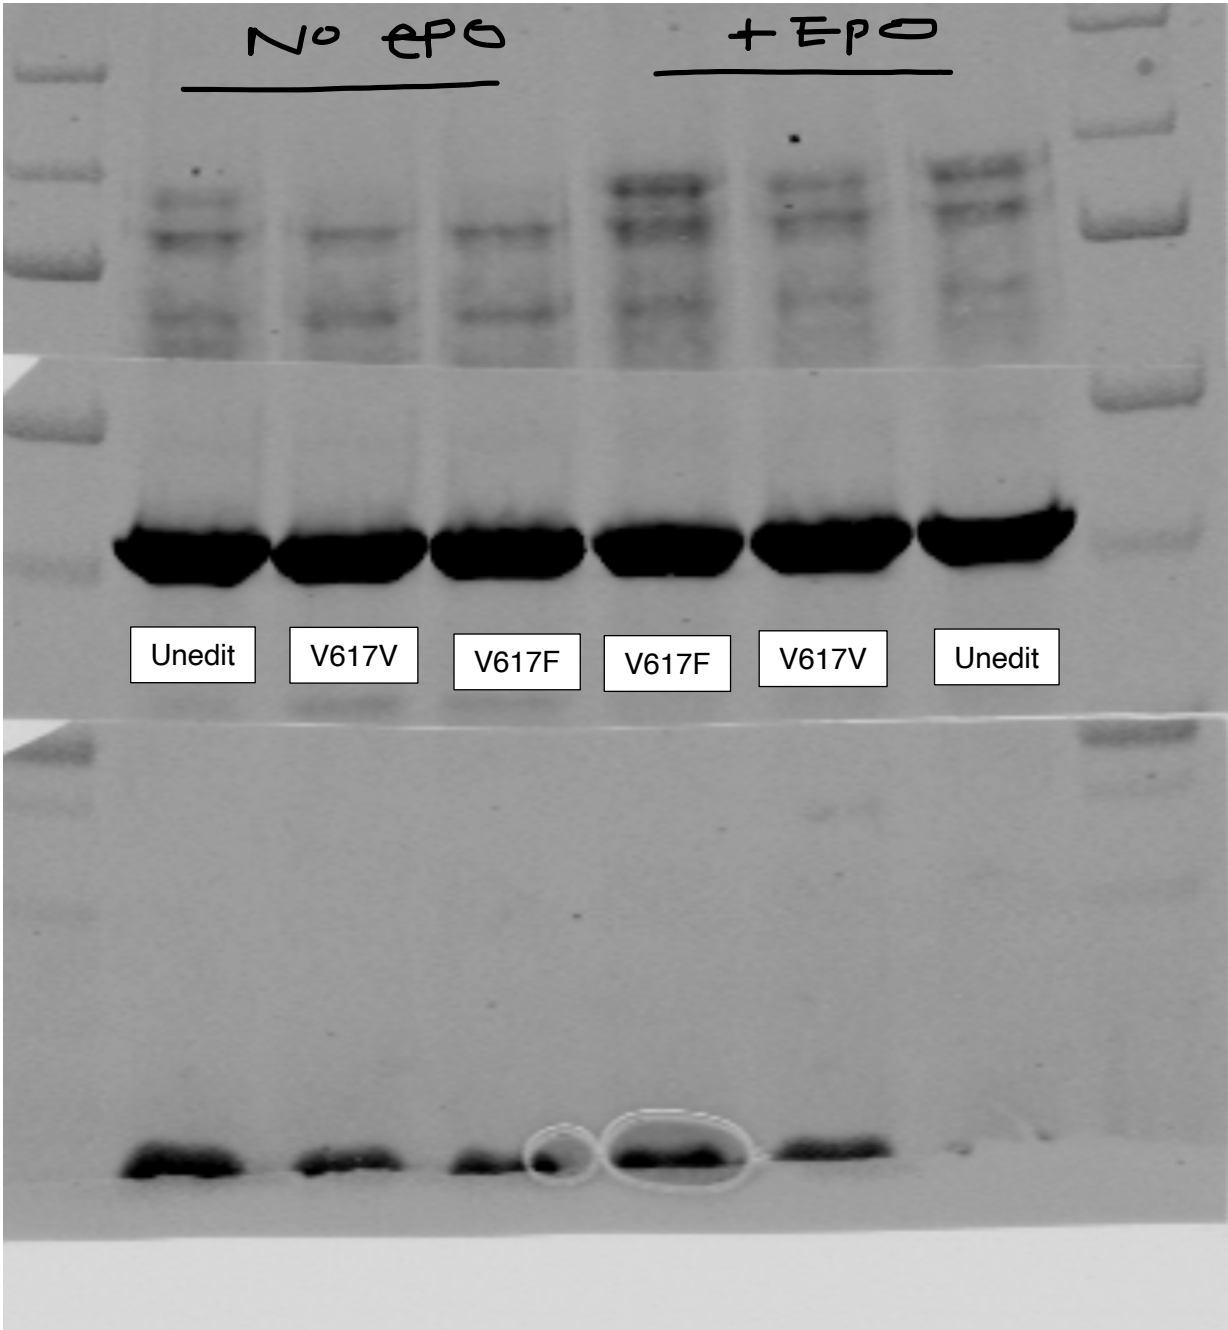

### Acquisition Information

| # | Image ID   | Acquire Time            | Channels | Resolution | Intensities | Image Name                    | Comment                         |
|---|------------|-------------------------|----------|------------|-------------|-------------------------------|---------------------------------|
| 1 | 0002307_02 | Mar 18, 2018 6:06:59 PM | 700 800  | 169um      | Auto Auto   | Blot 2: STAT5, GAPDH, Bglobin | new HSC colonies (100% and Epo) |

### Image Display Values

| Channel | Color                       | Minimum | Maximum | K |
|---------|-----------------------------|---------|---------|---|
| 700     | Gray Scale (Black on White) | 3.15    | 326     | 0 |
| 800     | Gray Scale (Black on White) | 0.821   | 1.38    | 0 |

Figure 4c STAT5 and GAPDH and Bglobin.

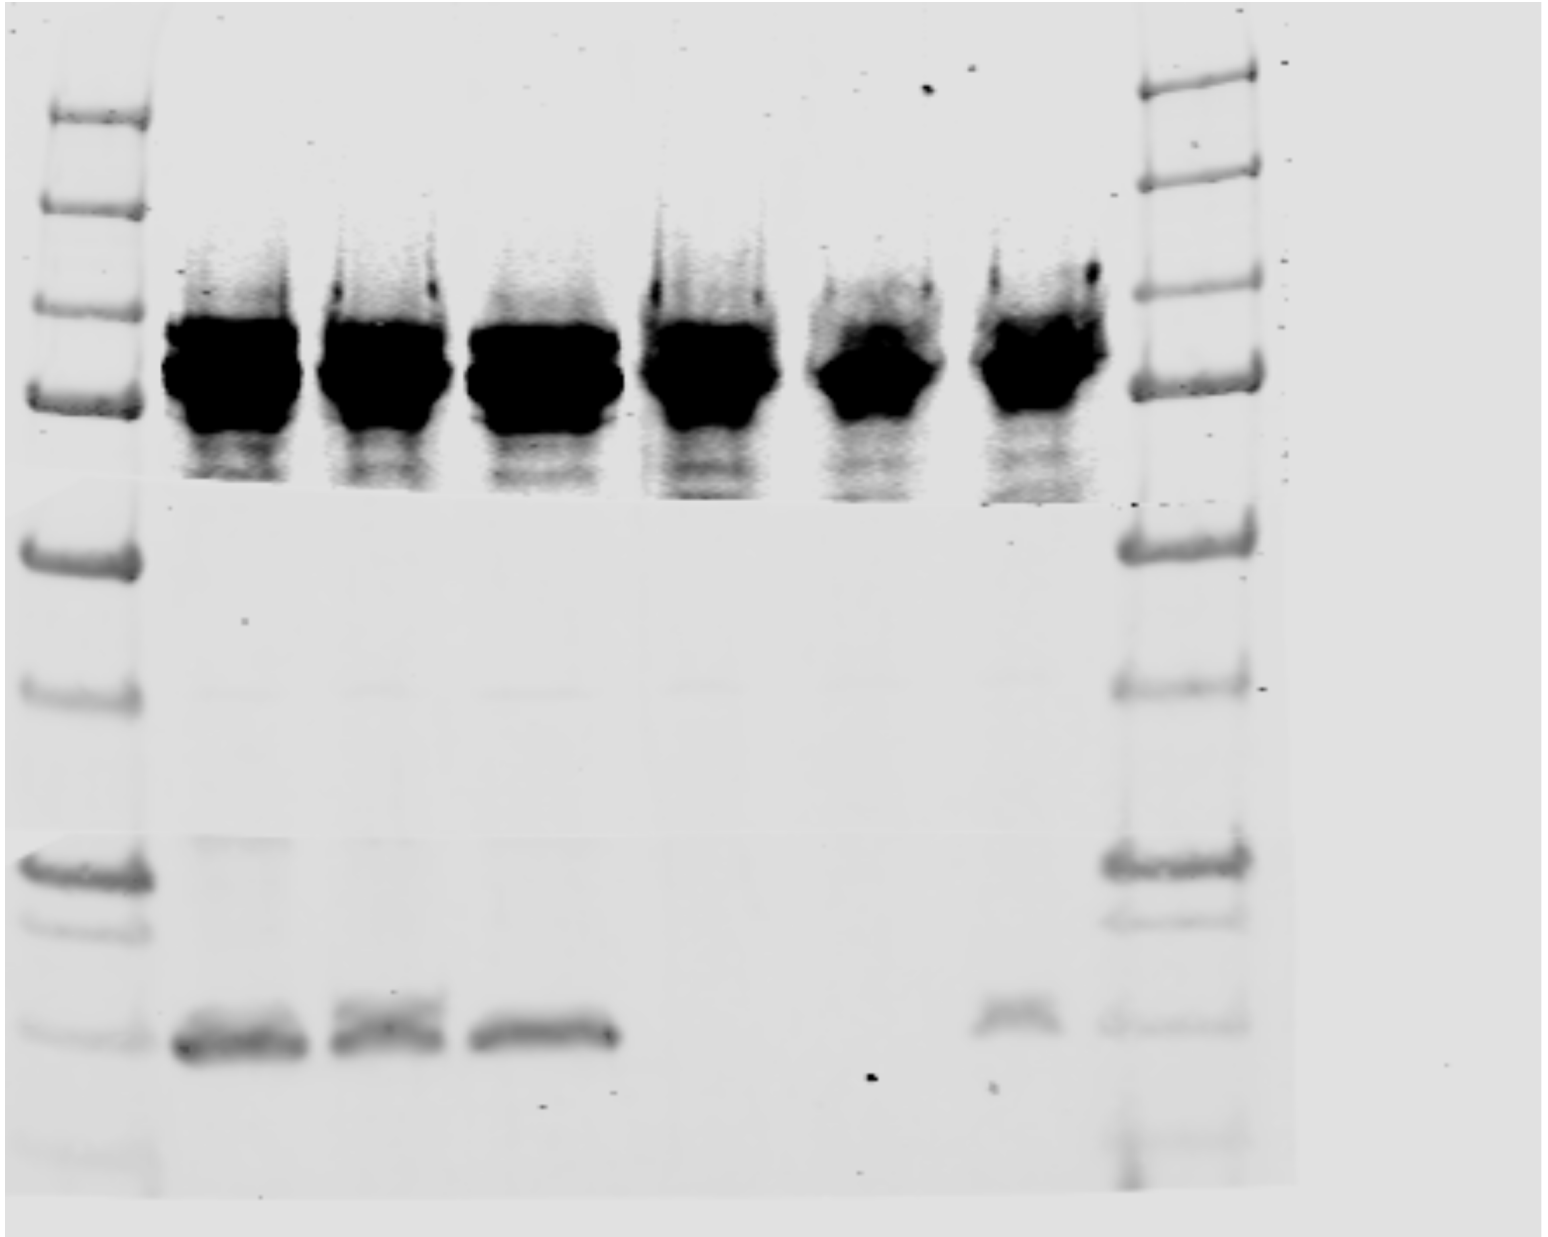

## Acquisition Information

| # | Image ID   | Acquire Time            | Channels | Resolution | Intensities | Image Name                                            | Comment |
|---|------------|-------------------------|----------|------------|-------------|-------------------------------------------------------|---------|
| 1 | 0001536_01 | Dec 5, 2017 12:50:37 AM | 700 800  | 169um      | Auto Auto   | HUDEP 0% Epo; JAK2 (reblot on PSTAT5 blot) membrane 2 |         |

## Image Display Values

| Channel | Color                       | Minimum | Maximum | K |
|---------|-----------------------------|---------|---------|---|
| 700     | Gray Scale (Black on White) | 0.350   | 5.06    | 0 |
| 800     | Gray Scale (Black on White) | 0.786   | 1.02    | 0 |

Figure S2e JAK2

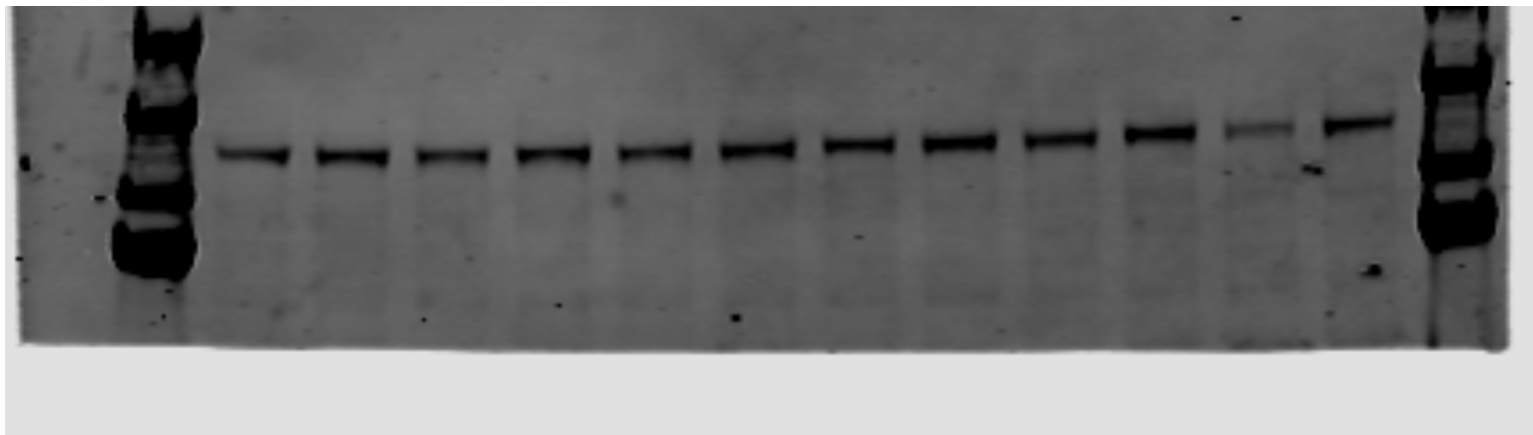

### Acquisition Information

| # | Image ID   | Acquire Time            | Channels | Resolution | Intensities | Image Name                     | Comment | Image | Modifications |
|---|------------|-------------------------|----------|------------|-------------|--------------------------------|---------|-------|---------------|
| 1 | 0001512_01 | Dec 1, 2017 10:35:28 PM | 700 800  | 169um      | Auto Auto   | HUDEP 0% Epo; PSTAT5 and GAPDH |         |       |               |

### Image Display Values

| Channel | Color                       | Minimum | Maximum | K |
|---------|-----------------------------|---------|---------|---|
| 700     | Gray Scale (Black on White) | 3.54    | 102     | 0 |
| 800     | Gray Scale (Black on White) | 0.0916  | 3.80    | 0 |

Figure S2e PSTAT5 and GAPDH

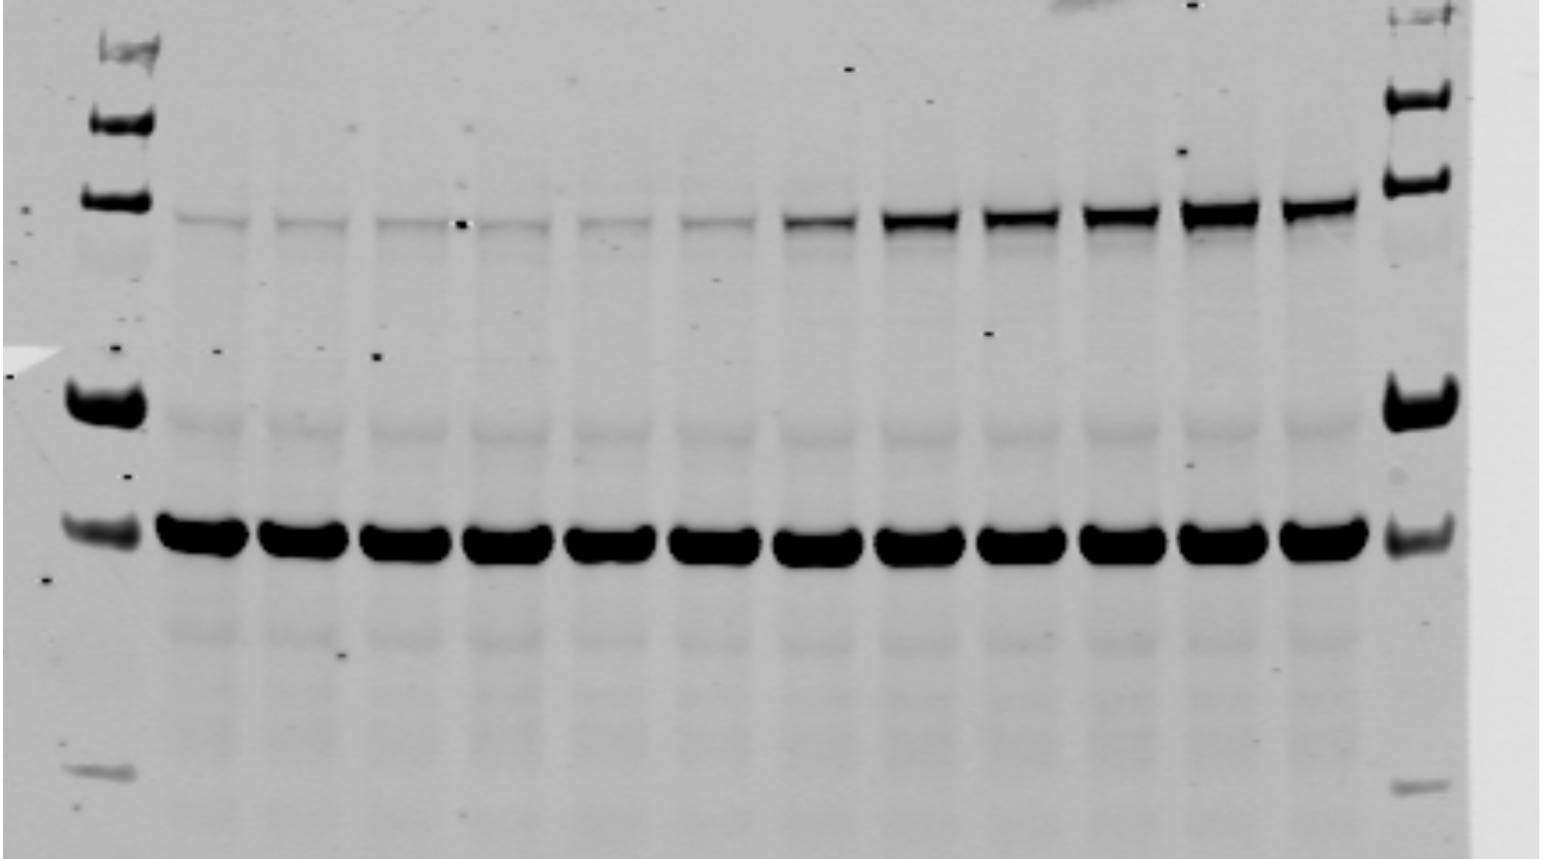

### Acquisition Information

| # | Image ID   | Acquire Time            | Channels | Resolution | Intensities | Image Name                    | Comment | Image | Modifications |
|---|------------|-------------------------|----------|------------|-------------|-------------------------------|---------|-------|---------------|
| 1 | 0001511_01 | Dec 1, 2017 10:30:42 PM | 700 800  | 169um      | Auto Auto   | HUDEP 0% Epo; STAT5 and GAPDH |         |       |               |

### Image Display Values

| Channel | Color                       | Minimum | Maximum | K |
|---------|-----------------------------|---------|---------|---|
| 700     | Gray Scale (Black on White) | 0.488   | 19.0    | 0 |
| 800     | Gray Scale (Black on White) | 0.759   | 51.6    | 0 |

Figure S2e STAT5 and GAPDH

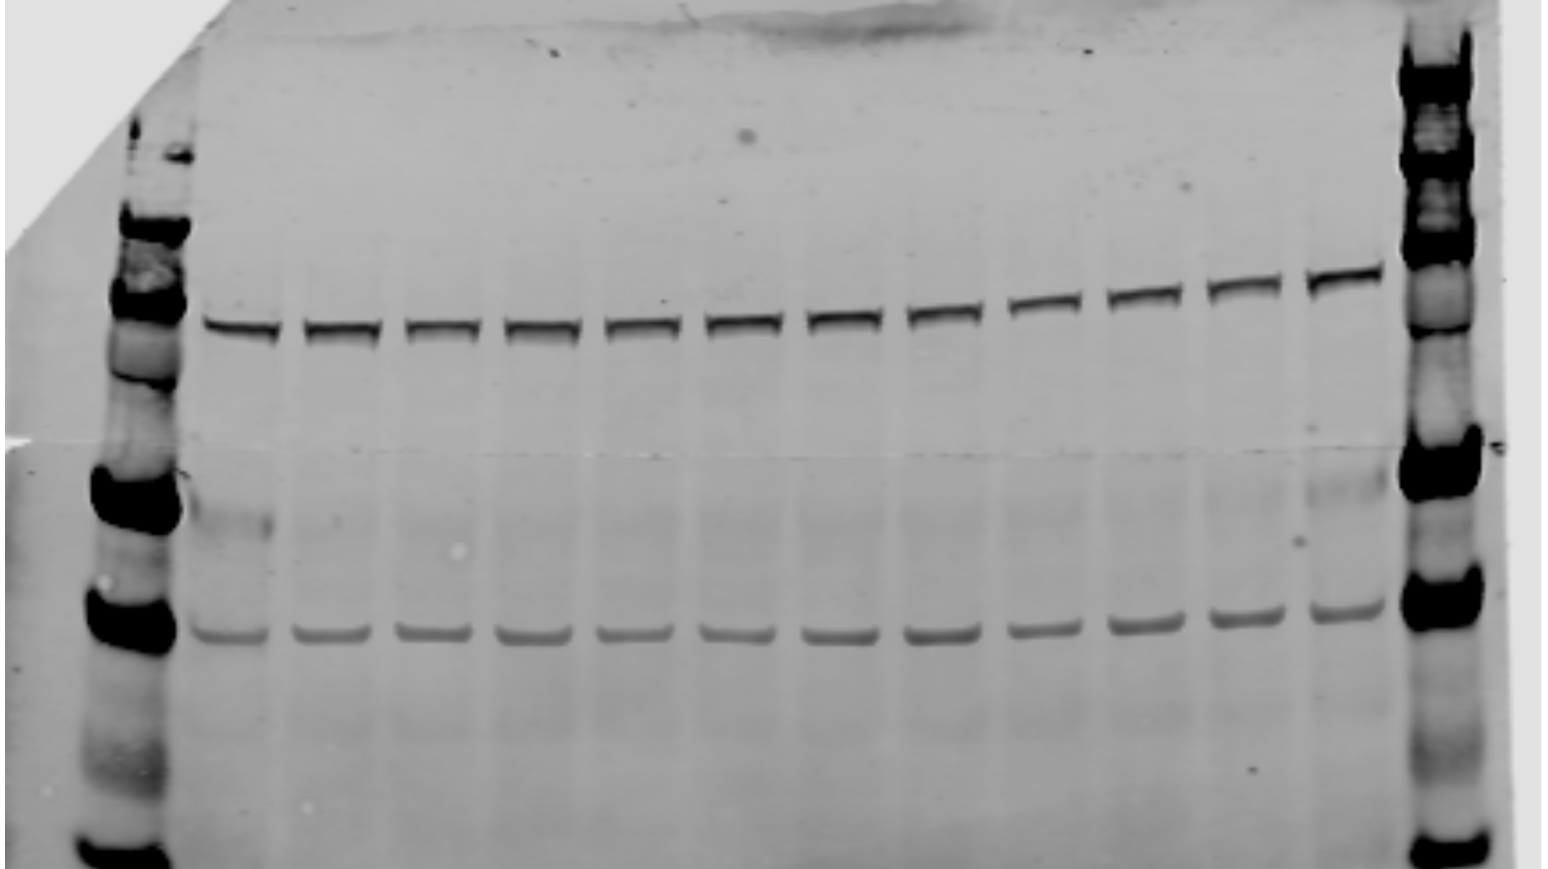

Acquisition Information

| # | Image ID   | Acquire Time            | Channels | Resolution | Intensities | Image Name                        | Comment                  |
|---|------------|-------------------------|----------|------------|-------------|-----------------------------------|--------------------------|
| 1 | 0003283_01 | Aug 10, 2018 2:27:30 PM | 700 800  | 169um      | Auto Auto   | Blot 2: PSTAT1, GAPDH and Bglobin | HUDEPs (100% and 0% Epo) |

Image Display Values

| Channel | Color                       | Minimum | Maximum | K |
|---------|-----------------------------|---------|---------|---|
| 700     | Gray Scale (Black on White) | 0.103   | 191     | 0 |
| 800     | Gray Scale (Black on White) | 0.169   | 1.62    | 0 |

Figure S2f PSTAT1 and GAPDH and Bglobin

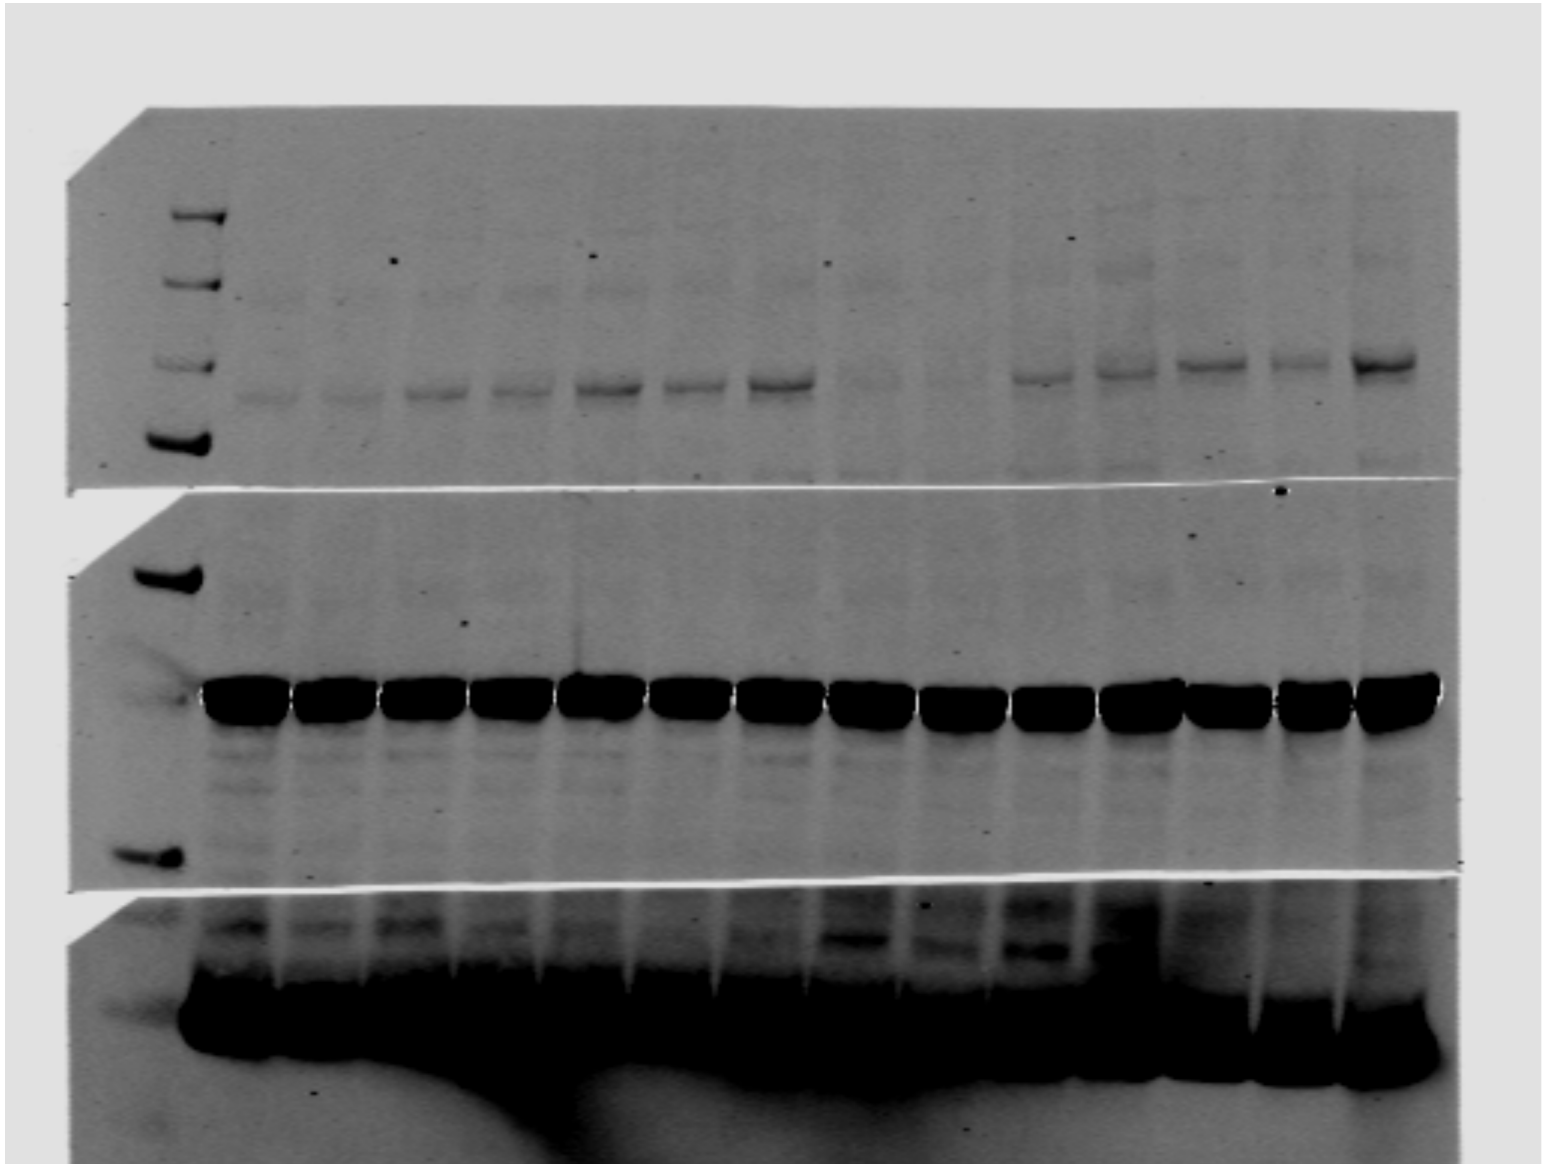

Acquisition Information

| # | Image ID   | Acquire Time            | Channels | Resolution | Intensities | Image Name                       |
|---|------------|-------------------------|----------|------------|-------------|----------------------------------|
| 1 | 0003285_01 | Aug 10, 2018 2:42:29 PM | 700 800  | 169um      | Auto Auto   | Blot 4: STAT1, GAPDH and Bglobin |

Image Display Values

| Channel | Color                       | Minimum | Maximum | K |
|---------|-----------------------------|---------|---------|---|
| 800     | Gray Scale (Black on White) | 0.304   | 2.10    | 0 |

Figure S2f STAT1 and GAPDH and Bglobin

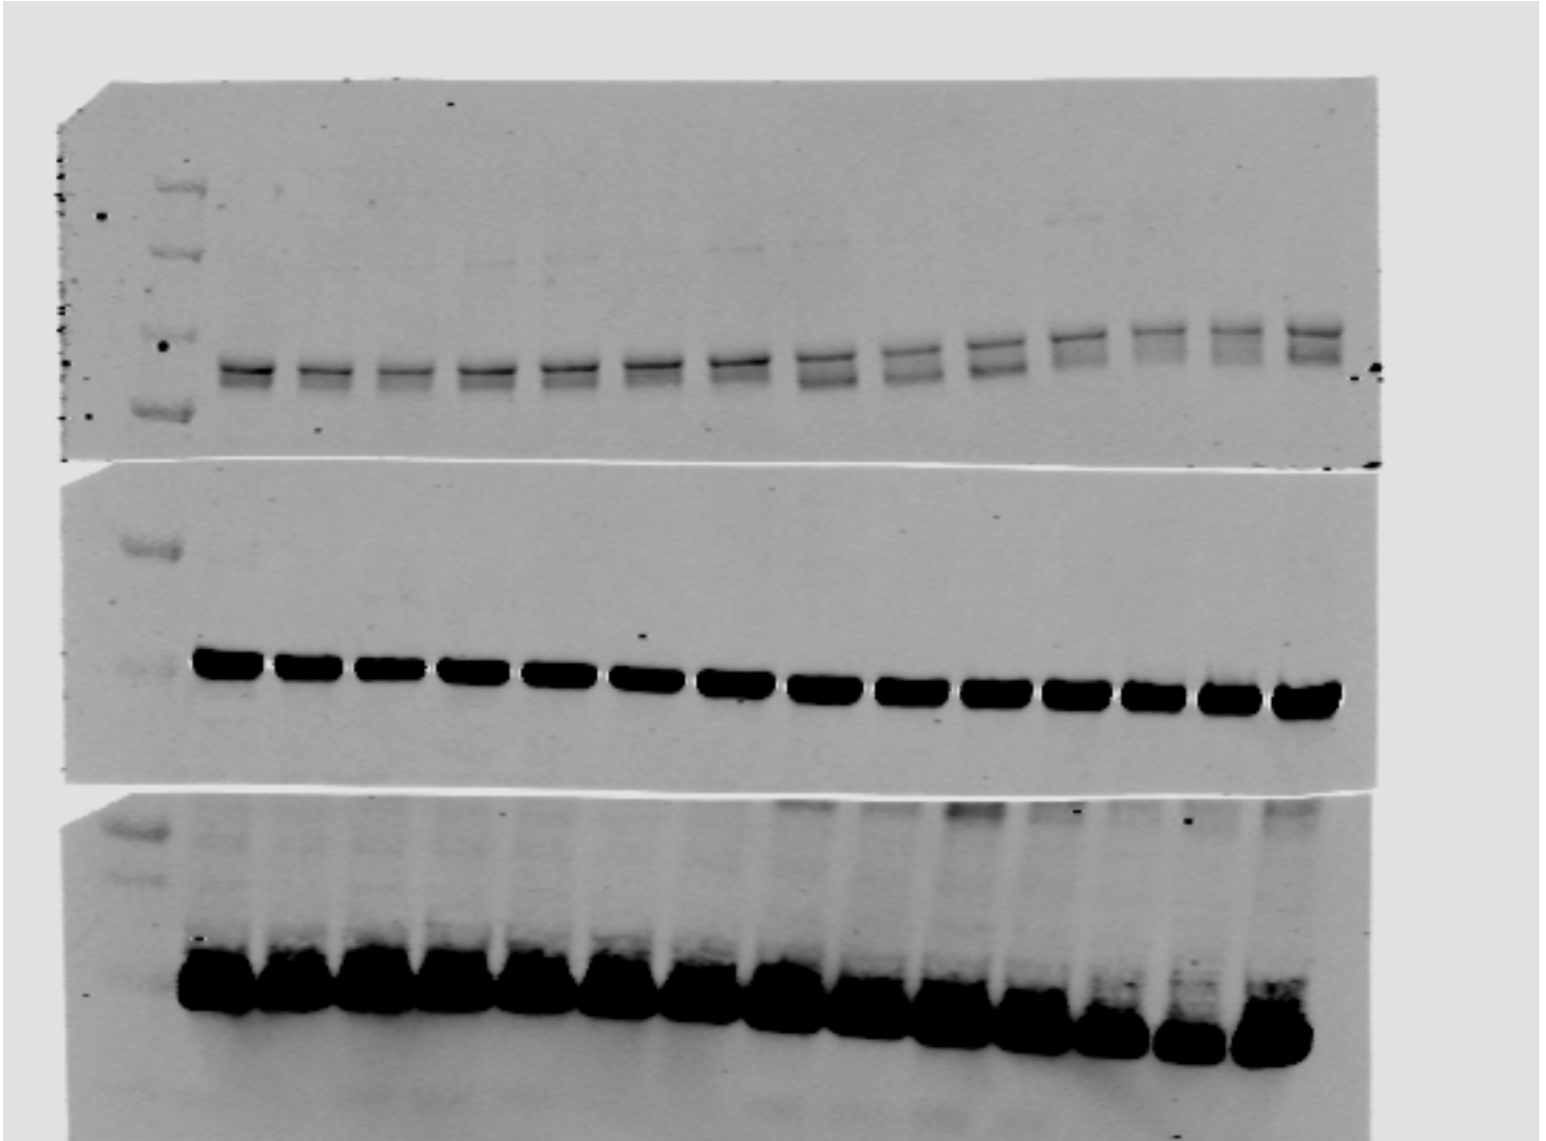

Supplement: pone.0247858.s005.pdf [file pone.0247858.s005.pdf]
